# Supplementary material for: The Association between Dietary Habits and Rapid Postoperative Recovery of Rotator Cuff Repair
Source: MDPI journal article supplement (doi:10.3390/nu15214587), 2023-10-28
Supplement: s1 [file s1]

**Table S1. Meanings of the abbreviations for hematological indicators.**

| <b>Abbreviation</b>                   | <b>Meaning</b>                            |
|---------------------------------------|-------------------------------------------|
| <b>Routine blood indexes</b>          |                                           |
| HCT                                   | hematocrit                                |
| HGB                                   | hemoglobin                                |
| EO#                                   | the number of eosinophilic granulocyte    |
| EO%                                   | the percent of eosinophilic granulocyte   |
| LY%                                   | the number of lymphocyte                  |
| BA#                                   | the number of basophilia                  |
| WBC                                   | white blood cell                          |
| MCHC                                  | mean corpusular hemoglobin concnertration |
| MCH                                   | mean corpusular hemoglobin                |
| MCV                                   | mean corpusular volume                    |
| RBC                                   | red blood cell                            |
| NE%                                   | the percent of neutrophilic granulocyte   |
| NE#                                   | the number of neutrophilic granulocyte    |
| MO#                                   | the number of macrophage                  |
| MPV                                   | mean platelet volume                      |
| PLT                                   | platelet count                            |
| LY#                                   | the number of lymphocyte                  |
| <b>Erythrocyte sedimentation rate</b> |                                           |
| ESR                                   | erythrocyte sedimentation rate            |
| <b>Coagulation indexes</b>            |                                           |
| TT                                    | thromboplastin time                       |
| INR                                   | international normalized ratio            |
| PT                                    | prothrombin time                          |
| FIB                                   | fibrinogen                                |
| APTT                                  | activated partial thromboplastin time     |
| <b>Blood biochemical indexes</b>      |                                           |
| P                                     | phosphorus                                |
| CO2CP                                 | carbondioxide combining power             |
| eGFR                                  | estimated glomerular filtration rate      |
| Na                                    | sodium                                    |
| UA                                    | uric acid                                 |
| ALT                                   | alanine amiotransferase                   |
| A/G                                   | albumin/globulin                          |
| Ca                                    | calcium                                   |
| Cl                                    | chloride                                  |
| Cr                                    | creatinine                                |
| AST                                   | aspartate aminotransferase                |
| $\gamma$ -GT                          | $\gamma$ -glutamyl transpeptadase         |
| TP                                    | total protein                             |
